# Supplementary material
Source: PubMed Central journal article supplement (PMC2777692)
Supplement: NIHMS143129-supplement-1_si_001.pdf [file NIHMS143129-supplement-1_si_001.pdf]

SUPPORTING INFORMATION FOR

# DFT Calculations on Mössbauer Parameters of Nonheme Iron Nitrosyls

Kathrin H. Hopmann,<sup>a</sup> Abhik Ghosh, <sup>\*,a</sup> Louis Noodleman, <sup>\*,b</sup>

Coordinates for geometry-optimized complexes (ADF, OLYP/STO-TZP,  
COSMO)

| <b>[Fe(SEt)<sub>4</sub>]<sup>1-</sup></b> |           |           |            |
|-------------------------------------------|-----------|-----------|------------|
| C                                         | 3.478202  | -5.023087 | -11.793611 |
| C                                         | 2.062875  | -5.522838 | -12.069808 |
| S                                         | 1.378595  | -6.628782 | -10.755448 |
| Fe                                        | -0.015698 | -5.304920 | -9.443107  |
| S                                         | -1.418964 | -3.955626 | -10.720033 |
| C                                         | -2.153101 | -5.026537 | -12.036211 |
| C                                         | -3.552635 | -5.544173 | -11.720516 |
| S                                         | -1.343927 | -6.715992 | -8.152534  |
| C                                         | -0.264983 | -7.407887 | -6.819887  |
| C                                         | 0.225328  | -8.828169 | -7.082125  |
| S                                         | 1.339944  | -3.910172 | -8.162013  |
| C                                         | 0.253709  | -3.153516 | -6.871170  |
| C                                         | -0.191349 | -1.728341 | -7.183176  |
| H                                         | -3.925162 | -6.140465 | -12.564298 |
| H                                         | -3.553957 | -6.181492 | -10.830704 |
| H                                         | -4.255908 | -4.721581 | -11.553650 |
| H                                         | 3.812628  | -4.380387 | -12.619083 |
| H                                         | 3.522259  | -4.435574 | -10.871440 |
| H                                         | 4.186383  | -5.853943 | -11.704839 |
| H                                         | -0.805913 | -1.343133 | -6.358708  |
| H                                         | 0.666491  | -1.058444 | -7.304969  |
| H                                         | -0.790106 | -1.686366 | -8.098182  |
| H                                         | 0.832394  | -9.172433 | -6.234180  |
| H                                         | -0.610674 | -9.525295 | -7.201945  |
| H                                         | 0.845110  | -8.878709 | -7.982975  |
| H                                         | 0.580388  | -6.728743 | -6.682826  |
| H                                         | -0.861182 | -7.377072 | -5.901690  |
| H                                         | 0.829499  | -3.172927 | -5.939920  |
| H                                         | -2.173217 | -4.414858 | -12.944399 |
| H                                         | -1.467176 | -5.858059 | -12.217187 |
| H                                         | -0.612635 | -3.805824 | -6.732239  |
| H                                         | 1.373468  | -4.683609 | -12.196848 |
| H                                         | 2.043662  | -6.106999 | -12.996507 |

**[FeS<sub>4</sub>C<sub>8</sub>O<sub>4</sub>]<sup>2-</sup>**

|    |          |           |           |
|----|----------|-----------|-----------|
| C  | 4.418189 | 4.398211  | 0.303530  |
| C  | 4.200192 | 5.749145  | 0.859027  |
| C  | 2.700142 | 5.463451  | 0.824248  |
| C  | 3.019599 | 4.126289  | 0.290129  |
| S  | 2.177980 | 2.725828  | -0.176964 |
| Fe | 4.252450 | 1.567730  | -0.502983 |
| S  | 5.735380 | 3.420984  | -0.138610 |
| S  | 4.524003 | 0.315679  | -2.527597 |
| C  | 4.643269 | -1.130115 | -1.641540 |
| C  | 4.777724 | -2.573828 | -1.919311 |
| C  | 4.773369 | -2.810004 | -0.410231 |
| C  | 4.620396 | -1.353371 | -0.234699 |
| S  | 4.465817 | -0.254280 | 1.050324  |
| O  | 1.680987 | 6.084201  | 1.128044  |
| O  | 4.905650 | 6.693296  | 1.213459  |
| O  | 4.854945 | -3.794410 | 0.324701  |
| O  | 4.853716 | -3.288734 | -2.918506 |

**[Fe(SPh)<sub>4</sub>]<sup>2-</sup>**

|    |           |           |           |
|----|-----------|-----------|-----------|
| C  | 0.164096  | 5.083546  | -0.799287 |
| C  | -0.276744 | 6.417463  | -0.662956 |
| C  | -1.666800 | 6.635678  | -0.541931 |
| C  | -2.569644 | 5.568035  | -0.550534 |
| C  | -2.116069 | 4.249353  | -0.679737 |
| C  | -0.740822 | 4.019558  | -0.805917 |
| S  | 0.844524  | 7.797763  | -0.653396 |
| Fe | 3.023436  | 7.168035  | -0.025977 |
| S  | 3.913215  | 9.341337  | 0.146865  |
| C  | 5.681911  | 9.385489  | 0.317372  |
| C  | 6.470053  | 8.216359  | 0.341523  |
| C  | 7.861257  | 8.285024  | 0.439662  |
| C  | 8.512228  | 9.521559  | 0.521807  |
| C  | 7.741663  | 10.691253 | 0.511121  |
| C  | 6.349058  | 10.626298 | 0.412244  |
| S  | 4.069272  | 5.617776  | -1.458937 |
| C  | 4.571610  | 6.276073  | -3.032963 |
| C  | 4.729327  | 5.415877  | -4.141754 |
| C  | 5.171625  | 5.902847  | -5.375686 |
| C  | 5.467909  | 7.261363  | -5.543197 |
| C  | 5.305829  | 8.125693  | -4.453639 |
| C  | 4.863064  | 7.643498  | -3.220122 |
| S  | 3.239922  | 5.880699  | 1.930209  |
| C  | 2.473147  | 6.604507  | 3.361257  |
| C  | 1.768140  | 7.826987  | 3.318217  |
| C  | 1.183390  | 8.364906  | 4.467486  |
| C  | 1.279131  | 7.703113  | 5.697379  |
| C  | 1.973763  | 6.488306  | 5.756031  |
| C  | 2.561753  | 5.947361  | 4.609457  |
| H  | 4.504945  | 4.357167  | -4.032695 |
| H  | 5.284268  | 5.214583  | -6.211534 |
| H  | 5.817811  | 7.639038  | -6.501667 |

|   |           |           |           |
|---|-----------|-----------|-----------|
| H | 5.532131  | 9.185904  | -4.559388 |
| H | 4.748704  | 8.327019  | -2.385328 |
| H | 1.673268  | 8.354927  | 2.375268  |
| H | 0.646994  | 9.310164  | 4.397590  |
| H | 0.821657  | 8.124426  | 6.590152  |
| H | 2.060425  | 5.955591  | 6.701529  |
| H | 3.097466  | 5.002909  | 4.678198  |
| H | 5.986490  | 7.247740  | 0.262388  |
| H | 8.439277  | 7.362013  | 0.445009  |
| H | 9.596862  | 9.572244  | 0.591551  |
| H | 8.227171  | 11.663441 | 0.577280  |
| H | 5.769779  | 11.547315 | 0.402162  |
| H | -2.040908 | 7.651724  | -0.435880 |
| H | -3.635031 | 5.769415  | -0.451518 |
| H | -2.818666 | 3.418575  | -0.682495 |
| H | -0.364595 | 3.002897  | -0.910292 |
| H | 1.224826  | 4.882089  | -0.905983 |

**[Fe(H<sub>2</sub>O)<sub>5</sub>NO]<sup>2+</sup>**

|    |           |           |           |
|----|-----------|-----------|-----------|
| O  | -0.076634 | -0.019741 | 2.135507  |
| Fe | -0.008480 | 0.221409  | -0.000766 |
| N  | -0.000551 | 1.998857  | 0.003823  |
| O  | 0.030761  | 3.149486  | -0.001820 |
| O  | 2.187030  | -0.123121 | -0.051369 |
| O  | 0.062232  | 0.017726  | -2.152850 |
| O  | 0.011840  | -2.001570 | 0.084410  |
| O  | -2.196393 | -0.145460 | -0.002366 |
| H  | 2.600368  | 0.224469  | -0.859876 |
| H  | 2.688163  | 0.297656  | 0.667141  |
| H  | -0.264896 | -0.796312 | -2.569307 |
| H  | 0.246947  | 0.660158  | 2.748142  |
| H  | -0.771482 | -2.487942 | -0.218494 |
| H  | 0.770531  | -2.475276 | -0.290907 |
| H  | 0.222080  | -0.867796 | 2.498941  |
| H  | -2.606425 | 0.100160  | 0.843919  |
| H  | -2.699321 | 0.361664  | -0.662000 |
| H  | -0.237712 | 0.739150  | -2.729481 |

**[Fe(NO)(dtci-Pr<sub>2</sub>)<sub>2</sub>]**

|    |           |           |          |
|----|-----------|-----------|----------|
| Fe | 1.309084  | -2.114228 | 3.733927 |
| S  | 2.553738  | -0.482662 | 4.764665 |
| S  | -0.174369 | -0.387185 | 4.097926 |
| S  | 2.477291  | -3.865161 | 4.625129 |
| S  | -0.242821 | -3.792628 | 3.940076 |
| O  | 2.027636  | -2.191505 | 0.987638 |
| N  | 1.713717  | -2.085350 | 2.129713 |
| N  | 1.052781  | 1.783331  | 5.225208 |
| N  | 0.852974  | -6.063150 | 5.008392 |
| C  | 1.145178  | 0.529169  | 4.774163 |
| C  | -0.269420 | 2.484990  | 5.160171 |
| C  | -0.212041 | 3.756501  | 4.305928 |
| C  | -0.860410 | 2.715245  | 6.555719 |
| C  | 2.194618  | 2.548519  | 5.836633 |

|   |           |           |          |
|---|-----------|-----------|----------|
| C | 3.307670  | 2.875101  | 4.831271 |
| C | 2.713622  | 1.931633  | 7.142907 |
| C | 1.018634  | -4.804529 | 4.592512 |
| C | 1.938759  | -6.902085 | 5.626848 |
| C | 3.056771  | -7.265398 | 4.639897 |
| C | 2.457743  | -6.345510 | 6.960104 |
| C | -0.502991 | -6.693116 | 4.901307 |
| C | -0.490873 | -7.954272 | 4.029774 |
| C | -1.139519 | -6.912933 | 6.278581 |
| H | -0.929166 | 1.786408  | 4.642156 |
| H | 1.734852  | 3.499638  | 6.109254 |
| H | 1.422322  | -7.832856 | 5.865858 |
| H | -1.112573 | -5.953717 | 4.377958 |
| H | -1.231715 | 4.138057  | 4.187382 |
| H | 0.186163  | 3.547038  | 3.308515 |
| H | 0.385051  | 4.552289  | 4.762333 |
| H | -1.874005 | 3.115179  | 6.445145 |
| H | -0.283270 | 3.434125  | 7.146138 |
| H | -0.927773 | 1.776870  | 7.114799 |
| H | 2.902577  | 3.339390  | 3.927252 |
| H | 3.883927  | 1.992587  | 4.542550 |
| H | 3.994081  | 3.590888  | 5.297236 |
| H | 3.378708  | 2.657987  | 7.623309 |
| H | 1.893839  | 1.718849  | 7.835318 |
| H | 3.281275  | 1.012175  | 6.979515 |
| H | 3.685916  | -6.408902 | 4.384508 |
| H | 2.649688  | -7.688064 | 3.716688 |
| H | 3.693114  | -8.026342 | 5.105286 |
| H | 3.065699  | -7.120708 | 7.439584 |
| H | 3.081770  | -5.457600 | 6.834012 |
| H | 1.633621  | -6.100698 | 7.636630 |
| H | 0.047447  | -8.788325 | 4.491048 |
| H | -0.053398 | -7.754126 | 3.047146 |
| H | -1.526271 | -8.276844 | 3.877171 |
| H | -2.168721 | -7.260048 | 6.137282 |
| H | -0.613256 | -7.668603 | 6.870512 |
| H | -1.174064 | -5.980680 | 6.850624 |

**[Fe(SPh)<sub>2</sub>(NO)<sub>2</sub>]<sup>1-</sup>**

|    |           |           |          |
|----|-----------|-----------|----------|
| C  | 8.482454  | 8.683762  | 2.491821 |
| C  | 8.961358  | 7.530949  | 3.151532 |
| C  | 10.282239 | 7.551652  | 3.643609 |
| C  | 11.084692 | 8.685810  | 3.494330 |
| C  | 10.598010 | 9.824830  | 2.843964 |
| C  | 9.291501  | 9.811793  | 2.339986 |
| S  | 7.878140  | 6.128706  | 3.288992 |
| Fe | 8.549056  | 4.702507  | 4.981823 |
| N  | 8.997545  | 5.522159  | 6.357028 |
| O  | 9.104544  | 5.952921  | 7.460782 |
| H  | 11.225104 | 10.706748 | 2.731751 |
| S  | 10.457910 | 3.495651  | 4.469943 |
| C  | 10.145319 | 2.283879  | 3.208290 |
| C  | 11.090947 | 1.251517  | 3.022568 |
| C  | 10.912993 | 0.284798  | 2.030723 |

|   |           |           |          |
|---|-----------|-----------|----------|
| C | 9.786576  | 0.315243  | 1.199066 |
| C | 8.843952  | 1.333873  | 1.373456 |
| C | 9.019235  | 2.307441  | 2.360394 |
| H | 9.646761  | -0.440512 | 0.429094 |
| N | 7.213750  | 3.731099  | 5.176552 |
| O | 6.247245  | 3.165311  | 5.578889 |
| H | 10.686061 | 6.676403  | 4.141569 |
| H | 12.099460 | 8.673659  | 3.887823 |
| H | 7.467653  | 8.693154  | 2.101052 |
| H | 8.279994  | 3.094048  | 2.467009 |
| H | 8.894527  | 10.687502 | 1.830099 |
| H | 11.658236 | -0.499288 | 1.911227 |
| H | 11.969203 | 1.208859  | 3.662571 |
| H | 7.963724  | 1.378600  | 0.734684 |

**[Fe(SC<sub>2</sub>H<sub>3</sub>N<sub>3</sub>)(SC<sub>2</sub>H<sub>2</sub>N<sub>3</sub>)(NO)<sub>2</sub>]**

|    |           |           |           |
|----|-----------|-----------|-----------|
| C  | 3.710155  | 4.628970  | 8.164163  |
| N  | 3.776250  | 5.796952  | 7.536359  |
| N  | 3.531491  | 5.437042  | 6.250425  |
| C  | 3.335961  | 4.103366  | 6.130830  |
| N  | 3.450311  | 3.563702  | 7.360835  |
| S  | 3.039522  | 3.311474  | 4.607943  |
| Fe | 1.662190  | 1.509555  | 5.104599  |
| N  | 0.565869  | 1.943345  | 6.283827  |
| O  | -0.395701 | 2.229314  | 6.908835  |
| S  | 2.839417  | -0.433238 | 5.779159  |
| C  | 3.208345  | -0.231383 | 7.445146  |
| N  | 3.410167  | -1.238758 | 8.341323  |
| C  | 3.707274  | -0.682536 | 9.547394  |
| N  | 3.704334  | 0.626280  | 9.471403  |
| N  | 3.394365  | 0.884922  | 8.167712  |
| N  | 0.922384  | 1.091028  | 3.662915  |
| O  | 0.105557  | 0.903007  | 2.830559  |
| H  | 3.856398  | 4.547022  | 9.233450  |
| H  | 3.333228  | -2.225894 | 8.133647  |
| H  | 3.914535  | -1.253571 | 10.439852 |
| H  | 3.382428  | 1.883236  | 7.829275  |
| H  | 3.508366  | 6.133041  | 5.517916  |

**[Fe<sub>2</sub>S<sub>2</sub>(S<sub>2</sub>-o-xy)<sub>2</sub>]<sup>2-</sup>**

|    |           |           |           |
|----|-----------|-----------|-----------|
| C  | -6.291789 | -0.359609 | 1.381940  |
| C  | -5.096291 | -0.675831 | 0.710519  |
| C  | -5.096291 | -0.675831 | -0.710519 |
| C  | -6.291789 | -0.359609 | -1.381940 |
| C  | -7.468544 | -0.051641 | -0.698642 |
| C  | -7.468544 | -0.051641 | 0.698642  |
| C  | -3.893949 | -1.031428 | 1.549382  |
| S  | -2.717235 | 0.378629  | 1.871105  |
| Fe | -1.336563 | 0.218544  | 0.000000  |
| S  | -2.717235 | 0.378629  | -1.871105 |
| C  | -3.893949 | -1.031428 | -1.549382 |
| Fe | 1.349542  | -0.212367 | 0.000000  |
| S  | 0.244547  | 1.760855  | 0.000000  |

|   |           |           |           |
|---|-----------|-----------|-----------|
| S | 2.731826  | -0.376459 | -1.870070 |
| C | 3.914457  | 1.028457  | -1.548616 |
| C | 5.115402  | 0.666355  | -0.710504 |
| C | 5.115402  | 0.666355  | 0.710504  |
| C | 6.308867  | 0.343034  | 1.381986  |
| C | 7.483751  | 0.027919  | 0.698641  |
| C | 7.483751  | 0.027919  | -0.698641 |
| C | 6.308867  | 0.343034  | -1.381986 |
| C | 3.914457  | 1.028457  | 1.548616  |
| S | 2.731826  | -0.376459 | 1.870070  |
| S | -0.231288 | -1.754453 | 0.000000  |
| H | -6.297660 | -0.371852 | 2.470412  |
| H | -8.377538 | 0.172741  | 1.252348  |
| H | -8.377538 | 0.172741  | -1.252348 |
| H | -6.297660 | -0.371852 | -2.470412 |
| H | -4.227882 | -1.360776 | -2.535004 |
| H | 6.314807  | 0.355054  | 2.470465  |
| H | 8.391268  | -0.202230 | 1.252382  |
| H | 8.391268  | -0.202230 | -1.252382 |
| H | 6.314807  | 0.355054  | -2.470465 |
| H | 4.249361  | 1.357106  | 2.534034  |
| H | 3.342986  | 1.847598  | 1.111642  |
| H | -3.318545 | -1.848472 | 1.113448  |
| H | -4.227882 | -1.360776 | 2.535004  |
| H | -3.318545 | -1.848472 | -1.113448 |
| H | 3.342986  | 1.847598  | -1.111642 |
| H | 4.249361  | 1.357106  | -2.534034 |

**[Fe<sub>2</sub>S<sub>2</sub>(OPh-*p*-CH<sub>3</sub>)<sub>4</sub>]<sup>2-</sup>**

|    |           |           |           |
|----|-----------|-----------|-----------|
| C  | -3.222671 | 0.323142  | -5.570280 |
| C  | -4.181654 | -0.313404 | -4.764221 |
| C  | -4.005685 | -0.460134 | -3.386751 |
| C  | -2.845047 | 0.032031  | -2.739854 |
| C  | -1.886125 | 0.687551  | -3.547677 |
| C  | -2.077620 | 0.820788  | -4.922703 |
| O  | -2.717020 | -0.125873 | -1.421102 |
| Fe | -1.405228 | -0.011721 | 0.000000  |
| O  | -2.717020 | -0.125873 | 1.421102  |
| C  | -2.845047 | 0.032031  | 2.739854  |
| C  | -4.005685 | -0.460134 | 3.386751  |
| C  | -4.181654 | -0.313404 | 4.764221  |
| C  | -3.222671 | 0.323142  | 5.570280  |
| C  | -2.077620 | 0.820788  | 4.922703  |
| C  | -1.886125 | 0.687551  | 3.547677  |
| C  | -3.396173 | 0.447336  | 7.067275  |
| C  | -3.396173 | 0.447336  | -7.067275 |
| Fe | 1.404978  | 0.033776  | 0.000000  |
| S  | 0.049321  | -1.759428 | 0.000000  |
| S  | -0.049409 | 1.782502  | 0.000000  |
| O  | 2.715916  | 0.149692  | -1.423306 |
| C  | 2.836700  | -0.024007 | -2.740973 |
| C  | 3.995089  | 0.455687  | -3.400707 |
| C  | 4.160744  | 0.292548  | -4.777742 |
| C  | 3.193174  | -0.348152 | -5.570386 |

|   |           |           |           |
|---|-----------|-----------|-----------|
| C | 2.049711  | -0.832852 | -4.909932 |
| C | 1.869885  | -0.684173 | -3.535207 |
| C | 3.356713  | -0.490467 | -7.066863 |
| O | 2.715916  | 0.149692  | 1.423306  |
| C | 2.836700  | -0.024007 | 2.740973  |
| C | 3.995089  | 0.455687  | 3.400707  |
| C | 4.160744  | 0.292548  | 4.777742  |
| C | 3.193174  | -0.348152 | 5.570386  |
| C | 2.049711  | -0.832852 | 4.909932  |
| C | 1.869885  | -0.684173 | 3.535207  |
| C | 3.356713  | -0.490467 | 7.066863  |
| H | 4.762136  | 0.955669  | -2.812008 |
| H | 5.067416  | 0.676054  | -5.244872 |
| H | 1.274973  | -1.340195 | -5.484774 |
| H | 0.974560  | -1.072343 | -3.059765 |
| H | 4.370202  | -0.229270 | -7.384735 |
| H | 2.663374  | 0.165227  | -7.610165 |
| H | 3.150571  | -1.513848 | -7.401062 |
| H | 4.762136  | 0.955669  | 2.812008  |
| H | 5.067416  | 0.676054  | 5.244872  |
| H | 1.274973  | -1.340195 | 5.484774  |
| H | 0.974560  | -1.072343 | 3.059765  |
| H | 4.370202  | -0.229270 | 7.384735  |
| H | 3.150571  | -1.513848 | 7.401062  |
| H | 2.663374  | 0.165227  | 7.610165  |
| H | -4.766108 | -0.957264 | 2.787232  |
| H | -0.989256 | 1.085243  | 3.083172  |
| H | -4.766108 | -0.957264 | -2.787232 |
| H | -0.989256 | 1.085243  | -3.083172 |
| H | -5.089349 | -0.706987 | 5.220872  |
| H | -1.308907 | 1.325102  | 5.508429  |
| H | -5.089349 | -0.706987 | -5.220872 |
| H | -1.308907 | 1.325102  | -5.508429 |
| H | -4.409590 | 0.175198  | 7.376001  |
| H | -2.701263 | -0.209539 | 7.607137  |
| H | -3.199366 | 1.468285  | 7.414289  |
| H | -4.409590 | 0.175198  | -7.376001 |
| H | -3.199366 | 1.468285  | -7.414289 |
| H | -2.701263 | -0.209539 | -7.607137 |

**[Fe<sub>2</sub>S<sub>2</sub>(C<sub>4</sub>H<sub>4</sub>N<sub>4</sub>)<sub>4</sub>]<sup>2-</sup>**

|    |           |           |           |
|----|-----------|-----------|-----------|
| C  | -0.714494 | -3.207038 | -4.065443 |
| C  | -1.107250 | -2.227591 | -3.160710 |
| N  | 0.000000  | -1.623483 | -2.600501 |
| C  | 1.107250  | -2.227591 | -3.160710 |
| C  | 0.714494  | -3.207038 | -4.065443 |
| Fe | 0.000000  | 0.000000  | -1.390144 |
| N  | 0.000000  | 1.623483  | -2.600501 |
| C  | -1.107250 | 2.227591  | -3.160710 |
| C  | -0.714494 | 3.207038  | -4.065443 |
| C  | 0.714494  | 3.207038  | -4.065443 |
| C  | 1.107250  | 2.227591  | -3.160710 |
| Fe | 0.000000  | 0.000000  | 1.372140  |
| S  | 1.748463  | 0.000000  | -0.009022 |

|   |           |           |           |
|---|-----------|-----------|-----------|
| S | -1.748463 | 0.000000  | -0.009022 |
| N | 0.000000  | -1.623071 | 2.582317  |
| C | 1.107270  | -2.227101 | 3.142528  |
| C | 0.714511  | -3.206352 | 4.047460  |
| C | -0.714511 | -3.206352 | 4.047460  |
| C | -1.107270 | -2.227101 | 3.142528  |
| N | 0.000000  | 1.623071  | 2.582317  |
| C | -1.107270 | 2.227101  | 3.142528  |
| C | -0.714511 | 3.206352  | 4.047460  |
| C | 0.714511  | 3.206352  | 4.047460  |
| C | 1.107270  | 2.227101  | 3.142528  |
| H | 2.107864  | -1.922059 | 2.860906  |
| H | 1.371871  | -3.842790 | 4.631951  |
| H | -1.371871 | -3.842790 | 4.631951  |
| H | -2.107864 | -1.922059 | 2.860906  |
| H | -2.107901 | 1.922643  | -2.879105 |
| H | 2.107901  | 1.922643  | -2.879105 |
| H | -1.371894 | 3.843637  | -4.649713 |
| H | 1.371894  | 3.843637  | -4.649713 |
| H | 2.107901  | -1.922643 | -2.879105 |
| H | 1.371894  | -3.843637 | -4.649713 |
| H | -1.371894 | -3.843637 | -4.649713 |
| H | -2.107901 | -1.922643 | -2.879105 |
| H | -2.107864 | 1.922059  | 2.860906  |
| H | -1.371871 | 3.842790  | 4.631951  |
| H | 1.371871  | 3.842790  | 4.631951  |
| H | 2.107864  | 1.922059  | 2.860906  |

**[Fe<sub>2</sub>(NO)<sub>2</sub>(Et-HPTB)(O<sub>2</sub>CPh)]<sup>2+</sup>**

|    |           |           |           |
|----|-----------|-----------|-----------|
| C  | 5.114793  | 0.087244  | 1.209500  |
| C  | 4.416139  | -0.070354 | 0.000966  |
| C  | 5.113610  | 0.090478  | -1.207770 |
| C  | 6.469960  | 0.420840  | -1.208993 |
| C  | 7.151392  | 0.592176  | 0.000469  |
| C  | 6.471135  | 0.417189  | 1.210142  |
| C  | 2.925718  | -0.354712 | 0.001060  |
| O  | 2.365759  | -0.449326 | -1.139139 |
| Fe | 0.237302  | -0.376157 | -1.778566 |
| N  | 0.009082  | -2.107876 | -1.443063 |
| O  | 0.182164  | -3.266925 | -1.543376 |
| O  | -0.022180 | 0.617525  | 0.000139  |
| C  | 0.080010  | 2.030831  | -0.000025 |
| C  | 0.844827  | 2.548340  | 1.238692  |
| N  | 0.468184  | 1.833607  | 2.483721  |
| C  | -0.796841 | 2.335914  | 3.083958  |
| C  | -1.921399 | 1.348565  | 2.980835  |
| N  | -1.779406 | 0.140948  | 2.452728  |
| C  | -3.023013 | -0.474437 | 2.562555  |
| C  | -3.917355 | 0.423302  | 3.188430  |
| N  | -3.181971 | 1.578960  | 3.444884  |
| C  | -5.248839 | 0.088117  | 3.452310  |
| C  | -5.665301 | -1.185170 | 3.065927  |
| C  | -4.784952 | -2.086896 | 2.435842  |
| C  | -3.459581 | -1.747269 | 2.175688  |



|    |           |           |           |
|----|-----------|-----------|-----------|
| Fe | 0.235261  | -0.374358 | 1.778654  |
| N  | 0.007511  | -2.106448 | 1.444430  |
| O  | 0.178749  | -3.265406 | 1.547898  |
| C  | -3.677968 | 2.786599  | 4.123343  |
| C  | -4.364381 | 3.787490  | 3.197461  |
| N  | 0.471290  | 1.832372  | -2.483283 |
| C  | -0.793708 | 2.334518  | -3.084137 |
| C  | -1.918490 | 1.347325  | -2.981337 |
| N  | -1.776974 | 0.139497  | -2.453036 |
| C  | -3.020805 | -0.475476 | -2.563418 |
| C  | -3.914558 | 0.422729  | -3.189519 |
| N  | -3.178762 | 1.578049  | -3.445851 |
| C  | -5.246411 | 0.088657  | -3.453036 |
| C  | -5.663775 | -1.184230 | -3.066211 |
| C  | -4.783797 | -2.086765 | -2.436544 |
| C  | -3.458144 | -1.748138 | -2.176683 |
| C  | -3.674311 | 2.786040  | -4.123942 |
| C  | -4.358512 | 3.787375  | -3.196894 |
| N  | 0.932451  | -0.525527 | -3.842921 |
| C  | 1.473342  | 0.592055  | -4.323373 |
| N  | 1.947269  | 0.444670  | -5.590241 |
| C  | 1.680500  | -0.870912 | -5.966024 |
| C  | 1.035456  | -1.470191 | -4.860181 |
| C  | 1.938562  | -1.569141 | -7.150049 |
| C  | 1.519410  | -2.896646 | -7.201815 |
| C  | 0.861724  | -3.501824 | -6.112491 |
| C  | 0.610791  | -2.804196 | -4.933800 |
| C  | 2.616406  | 1.456607  | -6.426229 |
| C  | 1.685092  | 2.157259  | -7.411792 |
| C  | 1.570061  | 1.830968  | -3.480063 |
| O  | 2.365505  | -0.448754 | 1.141025  |
| N  | 0.929812  | -0.524363 | 3.843330  |
| C  | 1.470510  | 0.593412  | 4.323634  |
| N  | 1.946884  | 0.445175  | 5.589596  |
| C  | 1.682776  | -0.871101 | 5.964551  |
| C  | 1.035823  | -1.469926 | 4.859571  |
| C  | 1.945263  | -1.570329 | 7.147118  |
| C  | 1.527771  | -2.898426 | 7.198395  |
| C  | 0.867649  | -3.502982 | 6.110220  |
| C  | 0.612766  | -2.804443 | 4.932956  |
| C  | 2.614724  | 1.457394  | 6.426128  |
| C  | 1.682370  | 2.157090  | 7.411969  |
| C  | 1.566337  | 1.832648  | 3.481119  |
| C  | 0.847488  | 2.546310  | -1.237682 |
| H  | 1.909807  | 2.360818  | -1.083415 |
| H  | 0.712661  | 3.629521  | -1.345596 |
| H  | -0.939319 | 2.449967  | -0.001392 |
| H  | 0.706799  | 3.630905  | 1.346787  |
| H  | 1.907638  | 2.364775  | 1.086174  |
| H  | 2.517303  | 1.811634  | 2.943811  |
| H  | 1.563217  | 2.743110  | 4.086902  |
| H  | 0.100317  | -3.286331 | 4.109223  |
| H  | 0.548188  | -4.538376 | 6.191189  |
| H  | 1.710011  | -3.476450 | 8.100186  |
| H  | 2.444456  | -1.108031 | 7.992715  |
| H  | 3.420974  | 0.944882  | 6.954771  |

## S10

|   |           |           |           |
|---|-----------|-----------|-----------|
| H | 3.087660  | 2.179342  | 5.759351  |
| H | 1.215584  | 1.446703  | 8.100017  |
| H | 2.268601  | 2.867775  | 8.003109  |
| H | 0.893139  | 2.714225  | 6.897683  |
| H | -0.630819 | 2.568399  | 4.140043  |
| H | -1.081388 | 3.281858  | 2.613173  |
| H | -2.794284 | -2.449915 | 1.685327  |
| H | -5.149520 | -3.067829 | 2.143673  |
| H | -6.693533 | -1.483924 | 3.251944  |
| H | -5.935299 | 0.778593  | 3.932792  |
| H | -4.363420 | 2.450349  | 4.903823  |
| H | -2.832996 | 3.252423  | 4.632620  |
| H | -5.234034 | 3.347109  | 2.701421  |
| H | -4.707433 | 4.637388  | 3.796130  |
| H | -3.680557 | 4.167408  | 2.432182  |
| H | 1.567658  | 2.741036  | -4.086371 |
| H | 2.520700  | 1.808915  | -2.942156 |
| H | 0.099715  | -3.286348 | -4.109258 |
| H | 0.540786  | -4.536643 | -6.193710 |
| H | 1.698135  | -3.473571 | -8.105016 |
| H | 2.435148  | -1.107255 | -7.997630 |
| H | 3.089642  | 2.178024  | -5.759290 |
| H | 3.423222  | 0.944062  | -6.954409 |
| H | 1.217871  | 1.447774  | -8.100533 |
| H | 0.896423  | 2.714493  | -6.897058 |
| H | 2.272684  | 2.867778  | -8.001533 |
| H | -1.078509 | 3.280944  | -2.613783 |
| H | -0.627414 | 2.567318  | -4.140083 |
| H | -2.793622 | -2.451610 | -1.686443 |
| H | -5.148843 | -3.067557 | -2.144420 |
| H | -6.692187 | -1.482357 | -3.251760 |
| H | -5.931476 | 0.780216  | -3.933722 |
| H | -2.829163 | 3.250903  | -4.633655 |
| H | -4.361372 | 2.450072  | -4.902938 |
| H | -5.227585 | 3.347396  | -2.699759 |
| H | -3.673242 | 4.167335  | -2.432839 |
| H | -4.701738 | 4.637373  | -3.795239 |
| H | 4.586157  | -0.043965 | -2.146378 |
| H | 6.994318  | 0.549063  | -2.153140 |
| H | 8.205878  | 0.859281  | 0.000371  |
| H | 6.996700  | 0.542460  | 2.154054  |
| H | 4.588111  | -0.049123 | 2.148301  |

**[Fe(NO)<sub>2</sub>{Fe(NO)(N(CH<sub>2</sub>CH<sub>2</sub>S)<sub>3</sub>)}-S,S']**

|    |          |           |          |
|----|----------|-----------|----------|
| C  | 3.942652 | -1.560592 | 3.237982 |
| S  | 4.070803 | 0.273741  | 3.344753 |
| Fe | 5.816153 | 0.690561  | 4.795436 |
| N  | 5.804821 | -0.413688 | 6.022738 |
| O  | 5.770567 | -1.040239 | 7.026691 |
| C  | 4.773003 | -2.160534 | 2.106713 |
| N  | 6.166367 | -1.647919 | 2.016812 |
| C  | 6.996717 | -2.131096 | 3.153637 |
| C  | 8.189334 | -1.235296 | 3.453941 |
| S  | 7.760711 | 0.549075  | 3.568983 |

## S11

|    |          |           |           |
|----|----------|-----------|-----------|
| C  | 6.793222 | -2.060204 | 0.728967  |
| C  | 6.251121 | -1.315729 | -0.477887 |
| S  | 6.249092 | 0.500186  | -0.223498 |
| N  | 5.689911 | 2.257273  | 5.345867  |
| O  | 5.594538 | 3.175984  | 6.084741  |
| Fe | 6.022117 | 0.677984  | 2.024500  |
| N  | 5.982912 | 2.397502  | 1.918209  |
| O  | 6.441792 | 3.407526  | 1.491112  |
| H  | 4.193818 | -1.976450 | 4.213826  |
| H  | 2.890122 | -1.787737 | 3.049877  |
| H  | 4.773555 | -3.256211 | 2.216914  |
| H  | 4.280734 | -1.930510 | 1.161426  |
| H  | 8.965228 | -1.297206 | 2.686972  |
| H  | 8.643495 | -1.532356 | 4.403162  |
| H  | 7.355896 | -3.152101 | 2.956869  |
| H  | 6.367124 | -2.186960 | 4.040046  |
| H  | 5.239192 | -1.633504 | -0.739999 |
| H  | 6.891511 | -1.531719 | -1.337720 |
| H  | 6.668877 | -3.144764 | 0.584410  |
| H  | 7.863541 | -1.862348 | 0.809624  |

**[Fe<sub>4</sub>S<sub>4</sub>(SPh)<sub>4</sub>]<sup>2-</sup>**

|    |           |           |           |
|----|-----------|-----------|-----------|
| C  | 19.213904 | 27.079127 | 8.264361  |
| C  | 18.054266 | 26.459330 | 8.773185  |
| C  | 17.029878 | 26.120485 | 7.866857  |
| C  | 17.169132 | 26.378181 | 6.501070  |
| C  | 18.324973 | 26.990701 | 6.005022  |
| C  | 19.343332 | 27.343072 | 6.898369  |
| S  | 17.940541 | 26.179844 | 10.529284 |
| Fe | 16.552126 | 24.385817 | 10.933856 |
| S  | 14.262544 | 24.737686 | 10.651112 |
| Fe | 14.625028 | 22.533168 | 10.424008 |
| S  | 16.916086 | 22.374178 | 10.007349 |
| Fe | 16.550974 | 22.025357 | 12.286079 |
| S  | 16.914303 | 24.036939 | 13.212609 |
| Fe | 14.623227 | 23.878152 | 12.793755 |
| S  | 14.261283 | 21.673880 | 12.566909 |
| S  | 13.227125 | 25.202390 | 14.061866 |
| C  | 13.169299 | 24.496962 | 15.699059 |
| C  | 14.312936 | 23.993049 | 16.349621 |
| C  | 14.226188 | 23.463364 | 17.639081 |
| C  | 13.002440 | 23.436891 | 18.316978 |
| C  | 11.863569 | 23.949924 | 17.685646 |
| C  | 11.942025 | 24.470596 | 16.390894 |
| S  | 17.937991 | 20.231286 | 12.693126 |
| C  | 18.057412 | 19.961563 | 14.450238 |
| C  | 17.034873 | 20.303556 | 15.357546 |
| C  | 17.178151 | 20.053233 | 16.724249 |
| C  | 18.336309 | 19.445044 | 17.220217 |
| C  | 19.352664 | 19.089149 | 16.325915 |
| C  | 19.219327 | 19.346049 | 14.959027 |
| S  | 13.231177 | 21.211984 | 9.150957  |
| C  | 13.172423 | 21.928425 | 7.518561  |
| C  | 14.317717 | 22.428393 | 6.867744  |
| C  | 14.230954 | 22.967550 | 5.582459  |

## S12

|   |           |           |           |
|---|-----------|-----------|-----------|
| C | 13.005305 | 23.007833 | 4.908651  |
| C | 11.864620 | 22.498695 | 5.540078  |
| C | 11.943315 | 21.968619 | 6.830894  |
| H | 20.020948 | 19.069024 | 14.278655 |
| H | 16.117935 | 20.758548 | 14.996568 |
| H | 20.016885 | 27.353595 | 8.944050  |
| H | 16.362594 | 26.103446 | 5.823595  |
| H | 16.114680 | 25.661906 | 8.227631  |
| H | 18.428849 | 27.193050 | 4.941283  |
| H | 20.248202 | 27.824277 | 6.532672  |
| H | 15.281885 | 22.391502 | 7.365501  |
| H | 15.130949 | 23.350842 | 5.104792  |
| H | 12.940869 | 23.425586 | 3.906342  |
| H | 10.904064 | 22.517188 | 5.029042  |
| H | 11.046811 | 21.584670 | 7.311542  |
| H | 15.275911 | 24.019587 | 15.848793 |
| H | 15.124776 | 23.076765 | 18.116692 |
| H | 12.938109 | 23.026616 | 19.322392 |
| H | 10.904433 | 23.941919 | 18.199637 |
| H | 11.046752 | 24.857464 | 15.910421 |
| H | 16.373052 | 20.330398 | 17.402569 |
| H | 18.443435 | 19.248446 | 18.284718 |
| H | 20.259049 | 18.610930 | 16.691696 |

**[Fe<sub>4</sub>S<sub>4</sub>(OPh)<sub>4</sub>]<sup>2-</sup>**

|    |           |          |           |
|----|-----------|----------|-----------|
| C  | 2.981446  | 0.805113 | 8.586726  |
| C  | 1.800088  | 1.492247 | 8.218719  |
| C  | 1.505324  | 2.704559 | 8.886933  |
| C  | 2.366425  | 3.214385 | 9.860079  |
| C  | 3.537977  | 2.531506 | 10.209205 |
| C  | 3.831641  | 1.321220 | 9.567110  |
| O  | 0.987393  | 0.969976 | 7.283517  |
| Fe | 0.186924  | 1.906573 | 5.809307  |
| S  | 1.456121  | 3.299815 | 4.572443  |
| Fe | -0.639847 | 4.342122 | 4.801530  |
| O  | -0.402064 | 6.247646 | 4.880177  |
| C  | 0.147338  | 7.016330 | 5.830217  |
| C  | 0.092960  | 8.426984 | 5.699939  |
| C  | 0.649290  | 9.258238 | 6.674094  |
| C  | 1.279619  | 8.721853 | 7.805263  |
| C  | 1.347283  | 7.330251 | 7.940956  |
| C  | 0.794179  | 6.489100 | 6.974021  |
| Fe | -0.003367 | 2.266547 | 3.069227  |
| O  | 0.761049  | 1.929128 | 1.353001  |
| C  | 1.134688  | 2.691872 | 0.317606  |
| C  | 1.466046  | 2.066830 | -0.910810 |
| C  | 1.854603  | 2.823116 | -2.017415 |
| C  | 1.927927  | 4.220392 | -1.941468 |
| C  | 1.610654  | 4.848309 | -0.730988 |
| C  | 1.222645  | 4.102975 | 0.384505  |
| Fe | -2.313967 | 2.147396 | 4.579132  |
| O  | -4.093594 | 1.499880 | 4.868613  |
| C  | -4.932966 | 0.725097 | 4.171617  |
| C  | -6.278682 | 0.610055 | 4.602774  |

|   |           |           |           |
|---|-----------|-----------|-----------|
| C | -7.183441 | -0.202778 | 3.918982  |
| C | -6.784964 | -0.926861 | 2.787226  |
| C | -5.459902 | -0.816992 | 2.348621  |
| C | -4.544869 | -0.004590 | 3.022172  |
| S | -0.724086 | 0.448941  | 4.217781  |
| S | -1.892314 | 3.651800  | 2.942627  |
| S | -1.609084 | 3.250809  | 6.517354  |
| H | 1.408732  | 0.981829  | -0.975686 |
| H | 2.100592  | 2.315819  | -2.948666 |
| H | 2.226719  | 4.807260  | -2.806961 |
| H | 1.664132  | 5.932739  | -0.650778 |
| H | 0.982916  | 4.608261  | 1.316306  |
| H | -0.394928 | 8.852427  | 4.824842  |
| H | 0.589160  | 10.337964 | 6.548340  |
| H | 1.709035  | 9.373767  | 8.562532  |
| H | 1.835608  | 6.890005  | 8.809602  |
| H | 0.861141  | 5.412922  | 7.094541  |
| H | -6.593144 | 1.169356  | 5.482127  |
| H | -8.210081 | -0.271882 | 4.274795  |
| H | -7.491638 | -1.562646 | 2.258964  |
| H | -5.129901 | -1.371136 | 1.471308  |
| H | -3.519021 | 0.063439  | 2.669618  |
| H | 0.591613  | 3.235662  | 8.635543  |
| H | 2.116031  | 4.153698  | 10.351306 |
| H | 4.207541  | 2.933483  | 10.966064 |
| H | 4.735433  | 0.773702  | 9.828590  |
| H | 3.218106  | -0.132842 | 8.087838  |

**[Fe<sub>4</sub>S<sub>4</sub>(SPh)<sub>2</sub>Cl<sub>2</sub>]<sup>2-</sup>**

|    |           |           |          |
|----|-----------|-----------|----------|
| C  | -3.070711 | 18.020366 | 3.546725 |
| C  | -3.679213 | 17.323618 | 2.496018 |
| C  | -3.280653 | 16.022724 | 2.178085 |
| C  | -2.253721 | 15.383496 | 2.903865 |
| C  | -1.631107 | 16.105344 | 3.940916 |
| C  | -2.040922 | 17.401186 | 4.262967 |
| S  | -1.817438 | 13.715463 | 2.452854 |
| Fe | -0.676451 | 12.636479 | 4.157897 |
| S  | -0.876517 | 10.355035 | 3.759626 |
| Fe | 1.177592  | 10.662960 | 4.631635 |
| Cl | 2.914582  | 9.426868  | 3.807376 |
| Fe | 0.690000  | 12.634330 | 6.525301 |
| S  | -1.522495 | 12.973740 | 6.300539 |
| Fe | -1.177185 | 10.671395 | 6.056525 |
| Cl | -2.923194 | 9.451049  | 6.885776 |
| S  | 0.872789  | 10.351345 | 6.929614 |
| S  | 1.538932  | 12.961130 | 4.381264 |
| S  | 1.838601  | 13.702814 | 8.230809 |
| C  | 2.252401  | 15.378514 | 7.786171 |
| C  | 3.279165  | 16.024966 | 8.505525 |
| C  | 3.661399  | 17.331443 | 8.190334 |
| C  | 3.036076  | 18.026861 | 7.148621 |
| C  | 2.006035  | 17.400567 | 6.439183 |
| C  | 1.612733  | 16.098992 | 6.758561 |
| H  | 3.783672  | 15.497733 | 9.311704 |

|   |           |           |          |
|---|-----------|-----------|----------|
| H | 4.459000  | 17.804330 | 8.760243 |
| H | 3.347257  | 19.037915 | 6.894531 |
| H | 1.504812  | 17.925121 | 5.626710 |
| H | 0.806447  | 15.638917 | 6.199387 |
| H | -3.771622 | 15.493902 | 1.364811 |
| H | -0.825938 | 15.650560 | 4.505701 |
| H | -4.476603 | 17.791107 | 1.921375 |
| H | -1.552221 | 17.926659 | 5.082461 |
| H | -3.394297 | 19.027134 | 3.801985 |

**[Fe<sub>4</sub>S<sub>4</sub>(OPh)<sub>2</sub>Cl<sub>2</sub>]<sup>2-</sup>**

|    |           |           |          |
|----|-----------|-----------|----------|
| C  | -3.203072 | 17.676353 | 2.984072 |
| C  | -3.631970 | 16.749672 | 2.023890 |
| C  | -3.157083 | 15.437251 | 2.033357 |
| C  | -2.226930 | 15.007260 | 3.012001 |
| C  | -1.788217 | 15.958776 | 3.963495 |
| C  | -2.273911 | 17.267406 | 3.947404 |
| O  | -1.801389 | 13.736865 | 2.992991 |
| Fe | -0.782843 | 12.658712 | 4.198468 |
| S  | -0.968886 | 10.359030 | 3.825986 |
| Fe | 1.135348  | 10.699231 | 4.574751 |
| Cl | 2.851198  | 9.471420  | 3.666655 |
| Fe | 0.720465  | 12.679732 | 6.520221 |
| S  | 1.442622  | 12.998750 | 4.312328 |
| Fe | -1.129521 | 10.663619 | 6.139933 |
| Cl | -2.788797 | 9.373531  | 7.060500 |
| S  | 0.982985  | 10.389833 | 6.888542 |
| S  | -1.515930 | 12.947575 | 6.409782 |
| O  | 1.691515  | 13.777204 | 7.742266 |
| C  | 2.199944  | 15.015911 | 7.699059 |
| C  | 3.174312  | 15.395594 | 8.655790 |
| C  | 3.728895  | 16.676270 | 8.643373 |
| C  | 3.340713  | 17.617209 | 7.680096 |
| C  | 2.373674  | 17.256400 | 6.734899 |
| C  | 1.803303  | 15.982130 | 6.744137 |
| H  | 3.484902  | 14.665998 | 9.401123 |
| H  | 4.475280  | 16.943657 | 9.388393 |
| H  | 3.783791  | 18.609895 | 7.662042 |
| H  | 2.062001  | 17.972349 | 5.976344 |
| H  | 1.054192  | 15.720451 | 6.003700 |
| H  | -3.498582 | 14.720828 | 1.288889 |
| H  | -1.072804 | 15.661170 | 4.722371 |
| H  | -4.347521 | 17.048670 | 1.259494 |
| H  | -1.920887 | 17.972502 | 4.698447 |
| H  | -3.584006 | 18.694886 | 2.983439 |

**[Fe<sub>4</sub>S<sub>4</sub>Cl<sub>4</sub>]<sup>2-</sup>**

|    |           |           |           |
|----|-----------|-----------|-----------|
| S  | -1.836403 | 0.000000  | 1.257596  |
| Fe | -1.406603 | 0.000000  | -0.950455 |
| Cl | -3.171858 | 0.000000  | -2.393235 |
| Fe | 0.000000  | 1.407752  | 0.952912  |
| Cl | 0.000000  | 3.181897  | 2.386723  |
| Fe | 0.000000  | -1.407752 | 0.952912  |
| Cl | 0.000000  | -3.181897 | 2.386723  |

## S15

|    |          |           |           |
|----|----------|-----------|-----------|
| Fe | 1.406603 | 0.000000  | -0.950455 |
| Cl | 3.171858 | 0.000000  | -2.393235 |
| S  | 1.836403 | 0.000000  | 1.257596  |
| S  | 0.000000 | 1.836230  | -1.254772 |
| S  | 0.000000 | -1.836230 | -1.254772 |

**[Fe<sub>4</sub>S<sub>4</sub>(SCH<sub>2</sub>CO<sub>2</sub>Et)<sub>4</sub>]<sup>2-</sup>**

|    |           |           |           |
|----|-----------|-----------|-----------|
| C  | -4.037315 | 3.615560  | -6.741024 |
| C  | -5.080733 | 2.956340  | -5.858797 |
| O  | -4.502033 | 2.556191  | -4.573232 |
| C  | -4.185172 | 1.258402  | -4.377747 |
| C  | -3.650894 | 1.075201  | -2.963634 |
| S  | -2.832691 | -0.540730 | -2.689044 |
| Fe | -1.335252 | -0.140182 | -0.986638 |
| S  | -1.901070 | -0.202646 | 1.195760  |
| Fe | -0.138893 | 1.333156  | 0.991496  |
| S  | -0.535495 | 2.828330  | 2.696693  |
| C  | 1.077773  | 3.658256  | 2.956258  |
| C  | 1.257203  | 4.216756  | 4.361147  |
| O  | 2.560559  | 4.499176  | 4.571399  |
| C  | 2.957767  | 5.086981  | 5.853727  |
| C  | 3.577534  | 4.039157  | 6.759571  |
| S  | 0.204037  | -1.899773 | -1.190336 |
| Fe | 1.335252  | 0.140182  | -0.986638 |
| S  | 1.901070  | 0.202646  | 1.195760  |
| Fe | 0.138893  | -1.333156 | 0.991496  |
| S  | 0.535495  | -2.828330 | 2.696693  |
| C  | -1.077773 | -3.658256 | 2.956258  |
| C  | -1.257203 | -4.216756 | 4.361147  |
| O  | -2.560559 | -4.499176 | 4.571399  |
| C  | -2.957767 | -5.086981 | 5.853727  |
| C  | -3.577534 | -4.039157 | 6.759571  |
| S  | -0.204037 | 1.899773  | -1.190336 |
| O  | -4.333342 | 0.373765  | -5.206473 |
| S  | 2.832691  | 0.540730  | -2.689044 |
| C  | 3.650894  | -1.075201 | -2.963634 |
| C  | 4.185172  | -1.258402 | -4.377747 |
| O  | 4.502033  | -2.556191 | -4.573232 |
| C  | 5.080733  | -2.956340 | -5.858797 |
| C  | 4.037315  | -3.615560 | -6.741024 |
| O  | 4.333342  | -0.373765 | -5.206473 |
| O  | 0.364205  | 4.409813  | 5.171587  |
| O  | -0.364205 | -4.409813 | 5.171587  |
| H  | -2.962750 | 1.894630  | -2.746206 |
| H  | -4.504092 | 1.187567  | -2.286389 |
| H  | -5.870374 | 3.661773  | -5.587594 |
| H  | -5.526633 | 2.082293  | -6.335052 |
| H  | -4.522911 | 3.971403  | -7.657002 |
| H  | -3.582824 | 4.477019  | -6.240292 |
| H  | -3.247070 | 2.912833  | -7.023790 |
| H  | 4.522911  | -3.971403 | -7.657002 |
| H  | 3.582824  | -4.477019 | -6.240292 |
| H  | 3.247070  | -2.912833 | -7.023790 |
| H  | 5.870374  | -3.661773 | -5.587594 |

## S16

|   |           |           |           |
|---|-----------|-----------|-----------|
| H | 5.526633  | -2.082293 | -6.335052 |
| H | 2.962750  | -1.894630 | -2.746206 |
| H | 4.504092  | -1.187567 | -2.286389 |
| H | 3.934315  | 4.528242  | 7.673364  |
| H | 4.433578  | 3.555782  | 6.276785  |
| H | 2.850858  | 3.271406  | 7.043856  |
| H | 3.687228  | 5.854194  | 5.581565  |
| H | 2.088908  | 5.561750  | 6.311226  |
| H | 1.899800  | 2.970252  | 2.748848  |
| H | 1.183533  | 4.500713  | 2.264029  |
| H | -3.934315 | -4.528242 | 7.673364  |
| H | -4.433578 | -3.555782 | 6.276785  |
| H | -2.850858 | -3.271406 | 7.043856  |
| H | -3.687228 | -5.854194 | 5.581565  |
| H | -2.088908 | -5.561750 | 6.311226  |
| H | -1.899800 | -2.970252 | 2.748848  |
| H | -1.183533 | -4.500713 | 2.264029  |

**[Fe<sub>4</sub>(NO)<sub>4</sub>(μ<sub>3</sub>-S)<sub>4</sub>]**

|    |           |           |           |
|----|-----------|-----------|-----------|
| S  | 0.000000  | 1.750676  | -1.226917 |
| Fe | -1.301659 | 0.000000  | -0.954228 |
| N  | -2.641345 | 0.000000  | -1.919577 |
| O  | -3.573818 | 0.000000  | -2.640431 |
| Fe | 1.301659  | 0.000000  | -0.954228 |
| N  | 2.641345  | 0.000000  | -1.919577 |
| O  | 3.573818  | 0.000000  | -2.640431 |
| Fe | 0.000000  | 1.302053  | 0.952364  |
| N  | 0.000000  | 2.637802  | 1.922669  |
| O  | 0.000000  | 3.566439  | 2.648219  |
| Fe | 0.000000  | -1.302053 | 0.952364  |
| N  | 0.000000  | -2.637802 | 1.922669  |
| O  | 0.000000  | -3.566439 | 2.648219  |
| S  | 1.749730  | 0.000000  | 1.224927  |
| S  | 0.000000  | -1.750676 | -1.226917 |
| S  | -1.749730 | 0.000000  | 1.224927  |

**[Fe<sub>4</sub>(NO)<sub>4</sub>(μ<sub>3</sub>-S)<sub>4</sub>]<sup>1-</sup>**

|    |           |           |           |
|----|-----------|-----------|-----------|
| S  | 0.000000  | -1.742821 | 1.229587  |
| Fe | -1.401454 | 0.000000  | 0.938337  |
| N  | -2.746001 | 0.000000  | 1.908862  |
| O  | -3.665900 | 0.000000  | 2.668337  |
| Fe | 1.401454  | 0.000000  | 0.938337  |
| N  | 2.746001  | 0.000000  | 1.908862  |
| O  | 3.665900  | 0.000000  | 2.668337  |
| Fe | 0.000000  | -1.299297 | -0.936562 |
| N  | 0.000000  | -2.648644 | -1.880685 |
| O  | 0.000000  | -3.590004 | -2.604430 |
| Fe | 0.000000  | 1.299297  | -0.936562 |
| N  | 0.000000  | 2.648644  | -1.880685 |
| O  | 0.000000  | 3.590004  | -2.604430 |
| S  | 1.764647  | 0.000000  | -1.277004 |
| S  | 0.000000  | 1.742821  | 1.229587  |
| S  | -1.764647 | 0.000000  | -1.277004 |



**[Fe<sub>4</sub>(NO)<sub>7</sub>(μ<sub>3</sub>-S)<sub>3</sub>]<sup>1-</sup>**

|    |           |           |           |
|----|-----------|-----------|-----------|
| S  | -1.018069 | -1.763347 | -0.611453 |
| Fe | -2.097067 | 0.000000  | 0.288316  |
| N  | -2.063602 | 0.000000  | 1.938531  |
| O  | -2.356837 | 0.000000  | 3.087513  |
| Fe | 0.000000  | 0.000000  | -1.412003 |
| N  | 0.000000  | 0.000000  | -3.056584 |
| O  | 0.000000  | 0.000000  | -4.241518 |
| Fe | 1.048534  | -1.816114 | 0.288316  |
| N  | 1.031801  | -1.787132 | 1.938531  |
| O  | 1.178419  | -2.041081 | 3.087513  |
| Fe | 1.048534  | 1.816114  | 0.288316  |
| N  | 1.031801  | 1.787132  | 1.938531  |
| O  | 1.178419  | 2.041081  | 3.087513  |
| S  | 2.036138  | 0.000000  | -0.611453 |
| S  | -1.018069 | 1.763347  | -0.611453 |
| N  | 1.821886  | -3.155599 | -0.290114 |
| O  | 2.414297  | -4.181684 | -0.364913 |
| N  | -3.643771 | 0.000000  | -0.290114 |
| O  | -4.828593 | 0.000000  | -0.364913 |
| N  | 1.821886  | 3.155599  | -0.290114 |
| O  | 2.414297  | 4.181684  | -0.364913 |
